# Supplementary material
Source: PubMed Central journal article supplement (PMC8445189)
Supplement: iai.00330-21-s0001.pdf [file iai.00330-21-s0001.pdf]

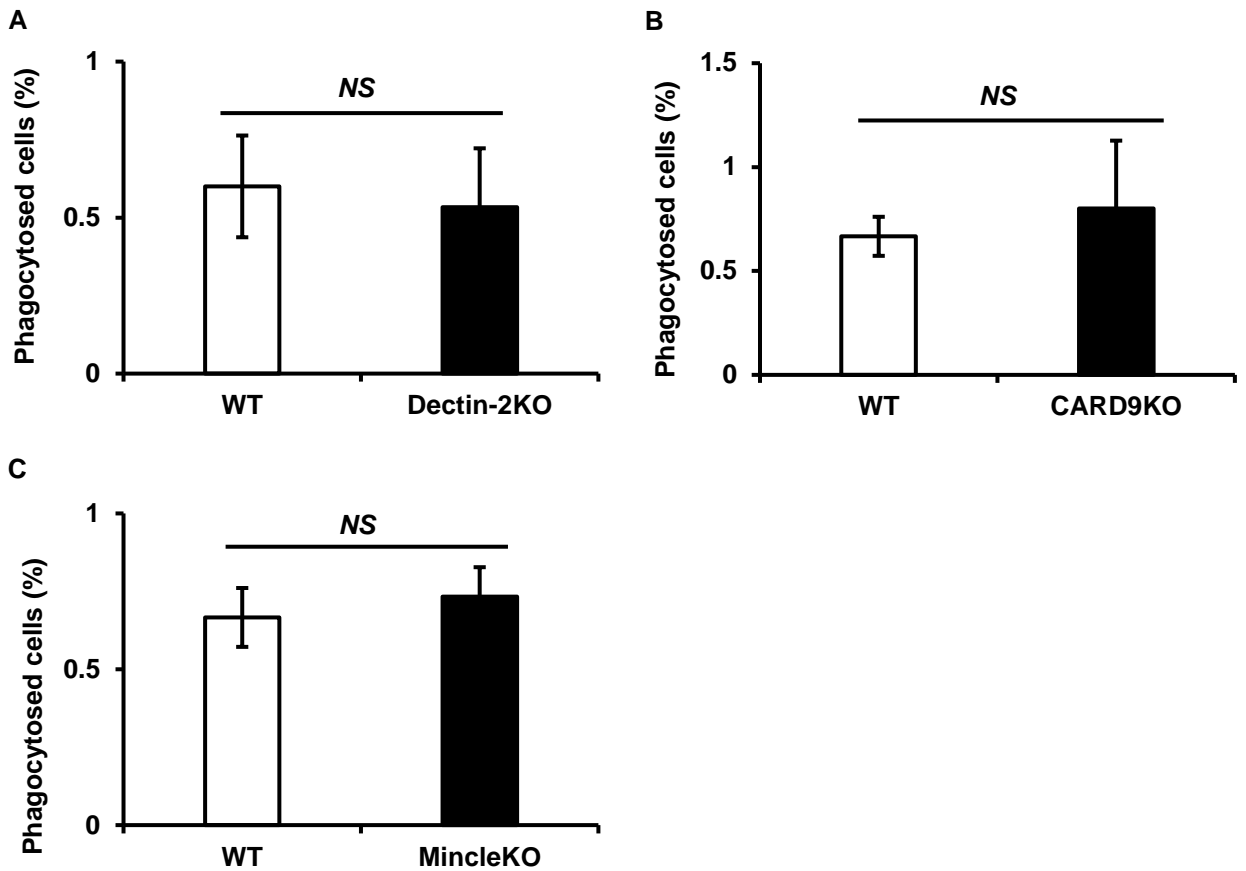

**Figure S1. Effect of Dectin-2, Mincle and CARD9 deficiency on the phagocytosis of *C.***

**neoformans B3501 strain by BM-DCs** BM-DCs prepared from WT and Dectin-2KO (A),

CARD9KO (B), and MincleKO (C) mice were cultured with *C. neoformans* B3501 for 2 h. These cells

were spun down onto a slide glass, stained with PAS and observed under a light microscope. The

proportions of phagocytosed cells are shown. Each column represents the mean  $\pm$  SD of triplicate

cultures. NS, not significant.
