# Supplementary material
Source: PubMed Central journal article supplement (PMC8445189)
Supplement: iai.00330-21-s0002.pdf [file iai.00330-21-s0002.pdf]

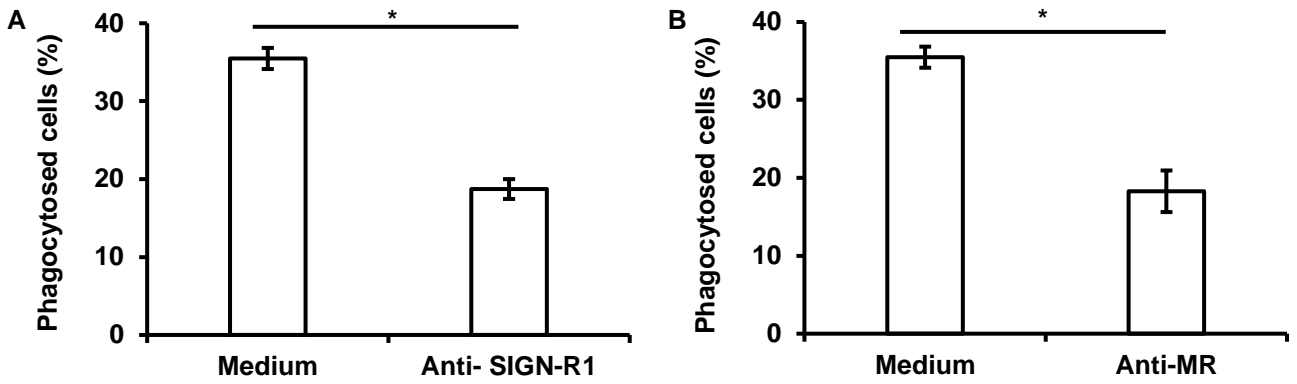

**Figure S2. Effect of anti-MR and anti-SIGN-R1 antibodies on the phagocytosis of *C. albicans* by BM-DCs** (A, B) BM-DCs from WT mice were preincubated with anti-MR Ab or anti-SIGN-R1 Ab for 30 min. These BM-DCs were cultured with *C. albicans* for 2 h. These cells were spun down onto a slide glass, stained with PAS and observed under a light microscope. The proportions of phagocytosed cells are shown.. Each column represents the mean  $\pm$  SD of triplicate cultures. \*,  $p < 0.05$ . NS, not significant.
